# Supplementary material
Source: PubMed Central journal article supplement (PMC6400326)

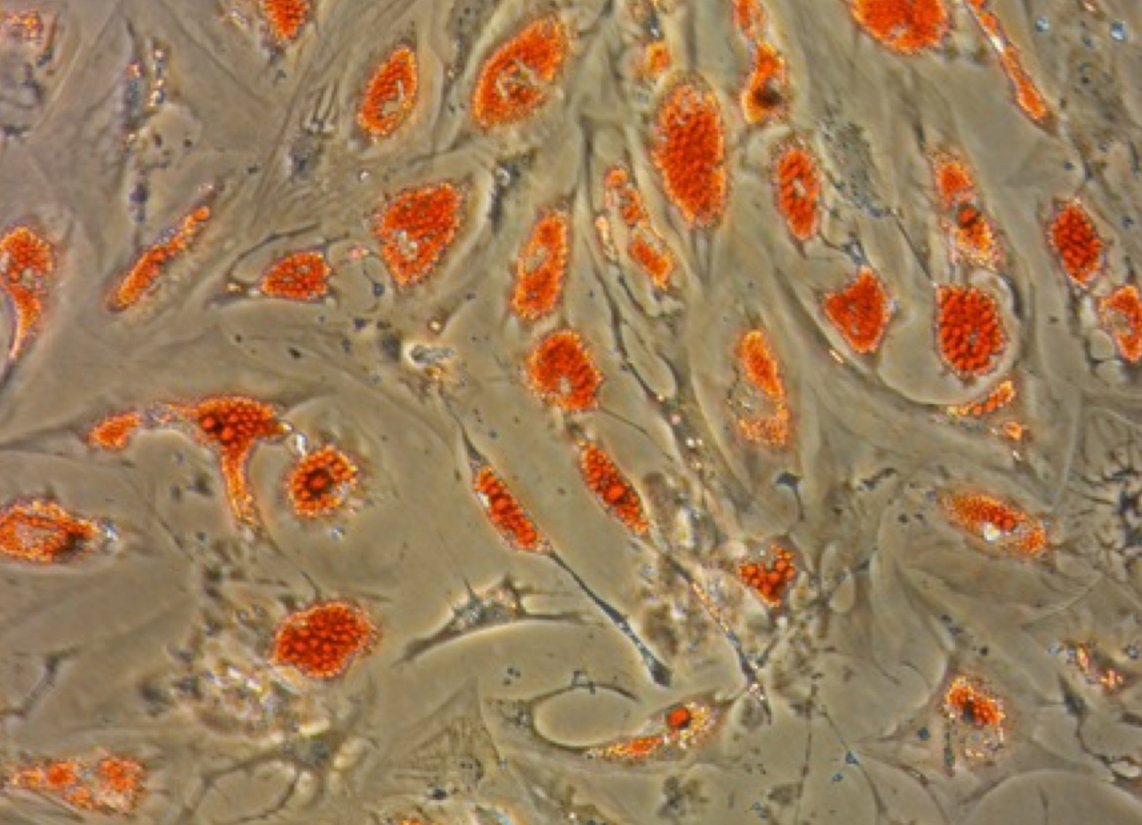

Supplement: NIHMS1509970-supplement-Supplemental_Digital_Content_1.pdf [file NIHMS1509970-supplement-Supplemental_Digital_Content_1.pdf]

**A**

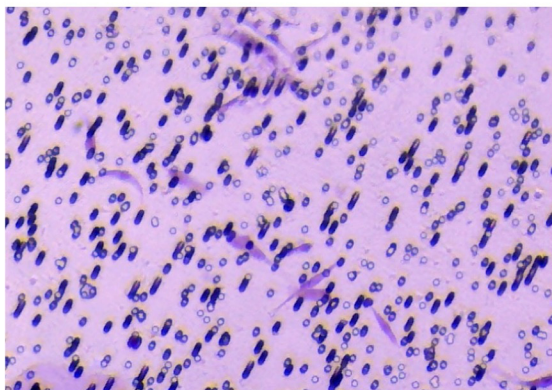

**Patient 1 (Wildtype for BRCA1 Gene)**

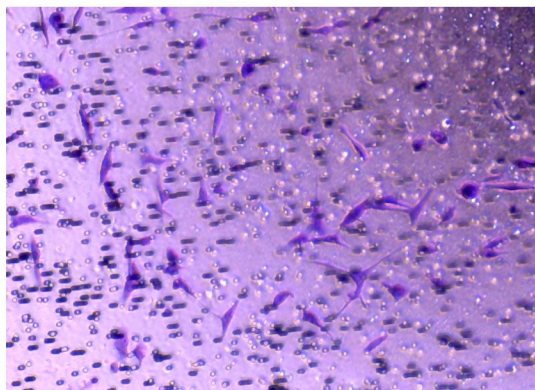

**Patient 3 (BRCA1 Mutation Carrier)**

**B**

**Transwell**

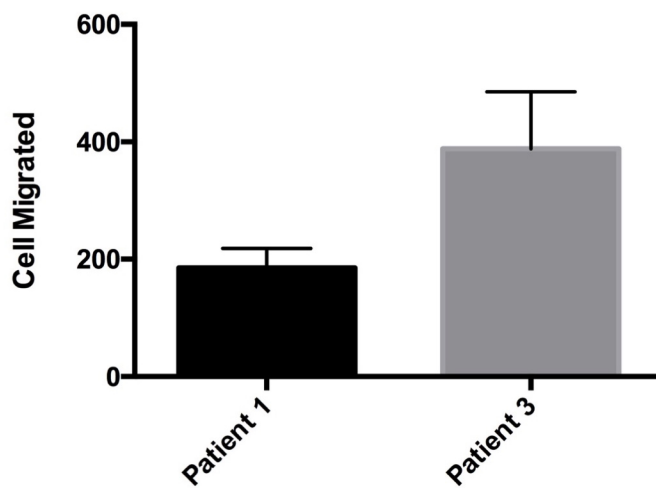

Supplement: NIHMS1509970-supplement-Supplemental_Digital_Content_2.pdf [file NIHMS1509970-supplement-Supplemental_Digital_Content_2.pdf]

### ELISA in ASC Supernatant

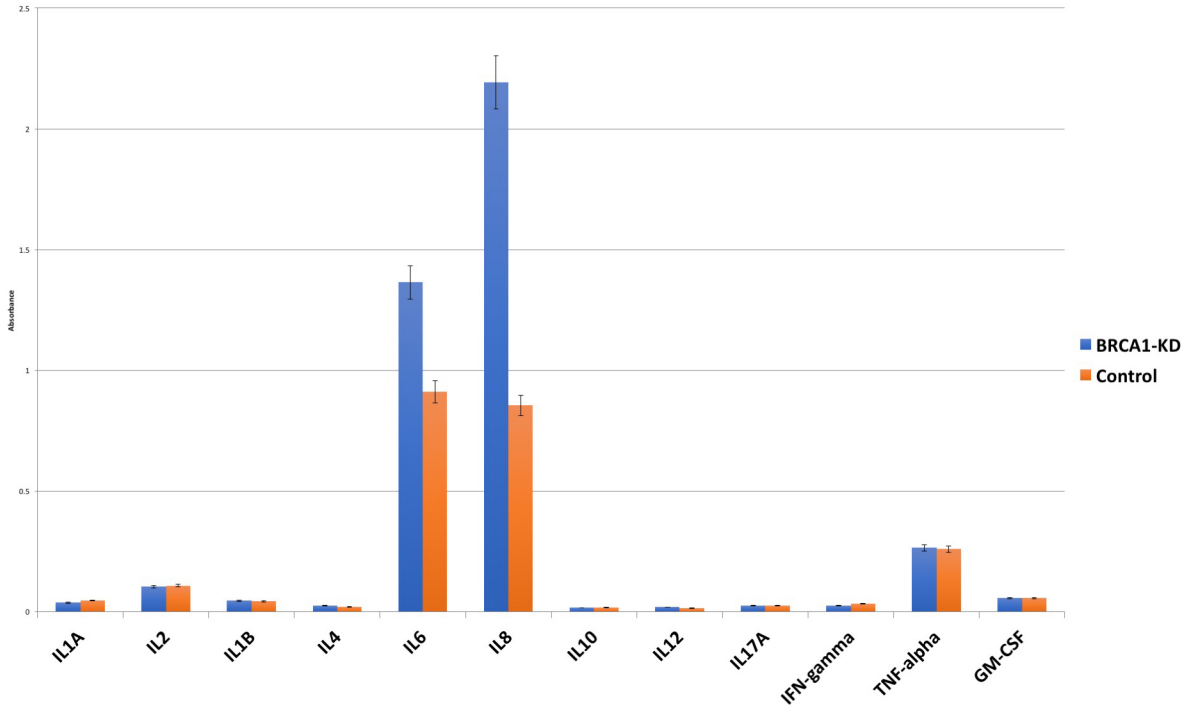

Supplement: NIHMS1509970-supplement-Supplemental_Digital_Content_3.pdf [file NIHMS1509970-supplement-Supplemental_Digital_Content_3.pdf]
